# Supplementary material for: Conformal microcapsules encapsulating microcarrier-L02 cell complexes for treatment of acetaminophen-induced liver injury in rats
Source: Royal Society of Chemistry journal article supplement (doi:10.1039/c6tb03033e), 2017-01-01
Supplement: c6tb03033e1.pdf [file c6tb03033e1.pdf]

**Electronic Supplementary Information**

for

**Conformal Microcapsules Encapsulating Microcarrier-L02 Cell Complexes for  
Treatment of Acetaminophen-induced Liver Injury in Rats**

Ying He<sup>a</sup>, Cong Liu<sup>a</sup>, Xiaoping Xia<sup>a, b</sup>, Longxiao Liu<sup>a, \*</sup>

<sup>a</sup> *Zhejiang University, College of Pharmaceutical Sciences, Hangzhou 310058, PR China;*

<sup>b</sup> *Zhejiang University, Women's Hospital, Hangzhou 310006, PR China*

\* Corresponding author

E-mail address: liulx@rocketmail.com

Tel/Fax: +86 571 88208435

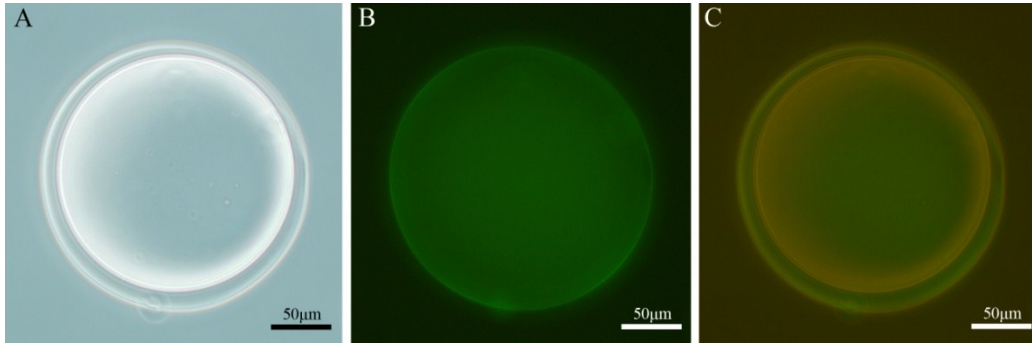

Fig. S1. ACA conformal microcapsules encapsulating microcarriers prepared with 0.3% (w/v) FITC-labeled chitosan solution. (A) Bright field image. (B) Fluorescence microscope image. (C) Merged image.
